# Supplementary material for: A Pooled Analysis of Fall Incidence From Placebo‐Controlled Trials of Denosumab
Source: PubMed Central journal article supplement — J Bone Miner Res. 2020 Apr 2;35(6):1014–21. doi: 10.1002/jbmr.3972 (PMC9328365; doi:10.1002/jbmr.3972), 2020-04-02

## Supplemental Material (Online only)

### A Pooled Analysis of Fall Incidence From Placebo-controlled Trials of Denosumab

Pojchong Chotiyarnwong MD PhD,<sup>1,2\*</sup> Eugene McCloskey MD,<sup>2\*</sup> Richard Eastell MD,<sup>2</sup>

Michael McClung MD,<sup>3</sup> Evelien Gielen MD PhD,<sup>4</sup> John Gostage MRes,<sup>2</sup> Michele

McDermott MD,<sup>5</sup> Arkadi Chines MD,<sup>5</sup> Shuang Huang PhD,<sup>5</sup> Steven R. Cummings MD<sup>6</sup>

\*Co-first authors.

<sup>1</sup>Department of Orthopaedic Surgery, Faculty of Medicine, Siriraj Hospital, Mahidol University, Bangkok, 10700, Thailand

<sup>2</sup>Academic Unit of Bone Metabolism, Department of Oncology and Metabolism, The Mellanby Centre For Bone Research, The Centre for Integrated Research in Musculoskeletal Ageing, University of Sheffield, Sheffield, UK

<sup>3</sup>Oregon Osteoporosis Center, Portland, OR, USA

<sup>4</sup>Center for Metabolic Bone Diseases, University Hospitals Leuven, Leuven, Belgium and Department of Chronic Diseases, Metabolism and Aging (CHROMETA), KU Leuven, Leuven, Belgium

<sup>5</sup>Amgen Inc., Thousand Oaks, CA, USA

<sup>6</sup>San Francisco Coordinating Center, California Pacific Medical Center (CPMC) Research Institute and the University of California, San Francisco, CA, USA

## Correspondence

Prof. Eugene McCloskey  
Academic Unit of Bone Metabolism  
Metabolic Bone Centre  
Northern General Hospital  
Herries Rd  
Sheffield S5 7AU  
United Kingdom  
Tel: +44 114 2159694  
Email: [e.v.mccloskey@sheffield.ac.uk](mailto:e.v.mccloskey@sheffield.ac.uk)

**Supplementary Figure S1** Impact of denosumab on falls risk (defined as one fall or more during follow-up) compared to the placebo arm, expressed as hazard ratio, across the range of age at baseline.

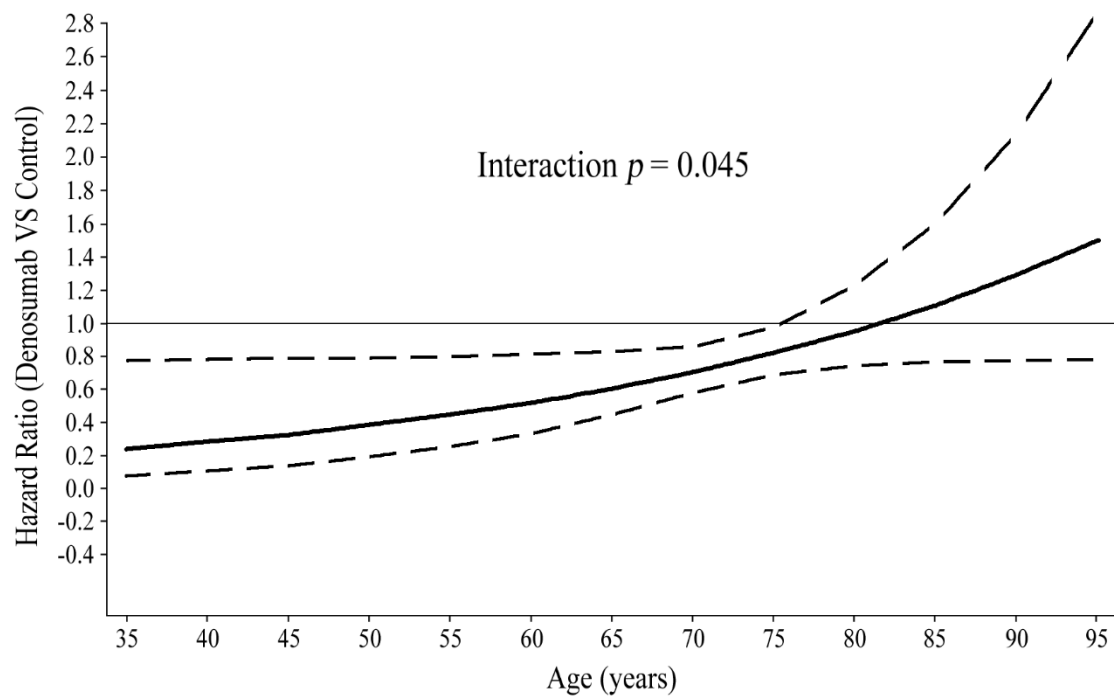

Supplement: JBMR-35-1014-s001.pdf [file JBMR-35-1014-s001.pdf]
